# Supplementary material for: Hyperosmolarity and Increased Serum Sodium Concentration Are Risks for Developing Hypertension Regardless of Salt Intake: A Five-Year Cohort Study in Japan
Source: MDPI journal article supplement (doi:10.3390/nu12051422), 2020-05-14
Supplement: s1 [file s1]

*Note:*

The Editorial Office would like to update the paper by removing the running title "Osmolarity and hypertension".

We apologize for any inconvenience caused to the readers.
